# Supplementary material for: Hierarchical self-assembly of NiFe-LDH nanosheets on CoFe2O4@Co3S4 nanowires for enhanced overall water splitting
Source: Royal Society of Chemistry journal article supplement (doi:10.1039/c9se01300h), 2020-01-01
Supplement: c9se01300h1.pdf [file c9se01300h1.pdf]

## Supporting Information

### Hierarchical Self-assembly of NiFe-LDH Nanosheets on $\text{CoFe}_2\text{O}_4@\text{Co}_3\text{S}_4$

#### Nanowires for Enhanced Overall Water Splitting

Yu Lin<sup>ab</sup>, Jinlei Wang<sup>ab</sup>, Duanlin Cao<sup>a</sup> and Yaqiong Gong<sup>ab\*</sup>

<sup>a</sup> School of Chemical Engineering and Technology, North University of China, Taiyuan, Shanxi 030051

<sup>b</sup> State Key Laboratory of Physical Chemistry of Solid Surfaces, Xiamen University, Xiamen, Fujian 361005

\*Corresponding author: E-mail: [gyq@nuc.edu.cn](mailto:gyq@nuc.edu.cn)

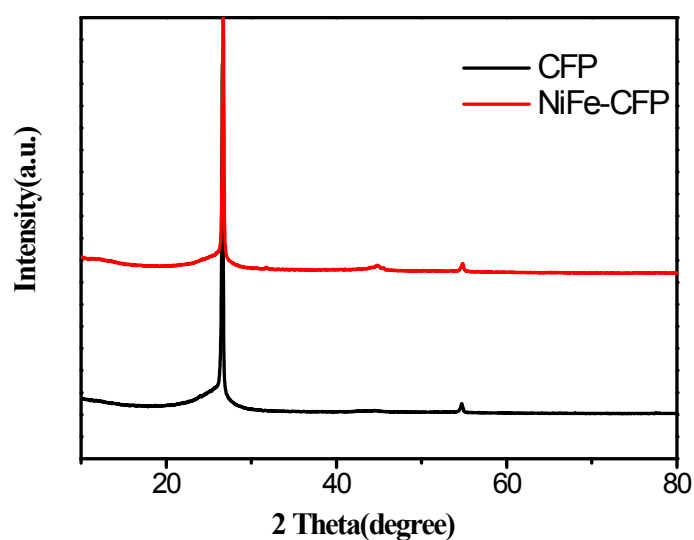

**Fig. S1** XRD patterns of the bare carbon fiber paper and NiFe-CFP.

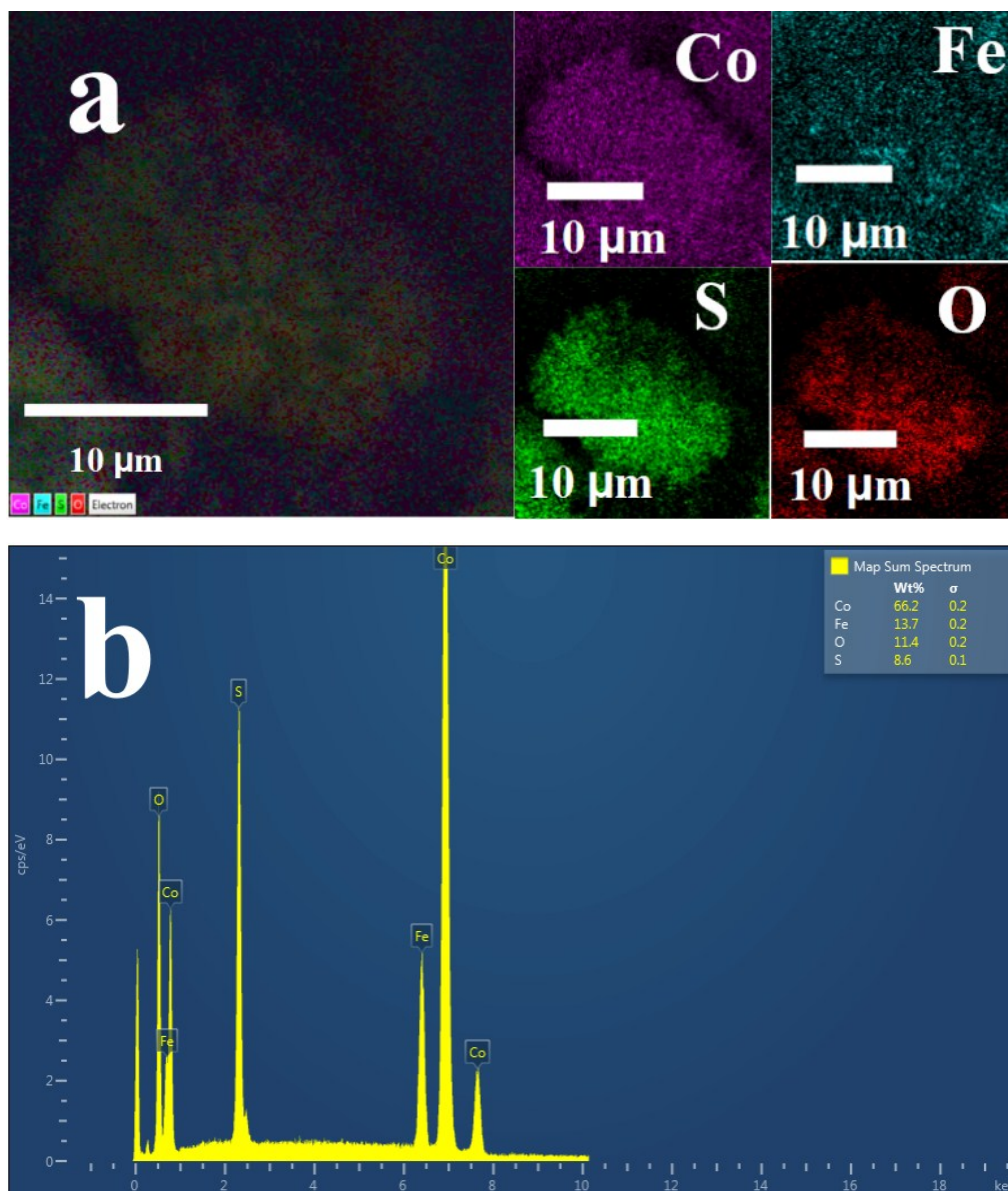

**Fig. S2** (a) SEM elemental mapping analysis of  $\text{CoFe}_2\text{O}_4@\text{Co}_3\text{S}_4/\text{CFP}$  (b) The corresponding EDX spectrum.

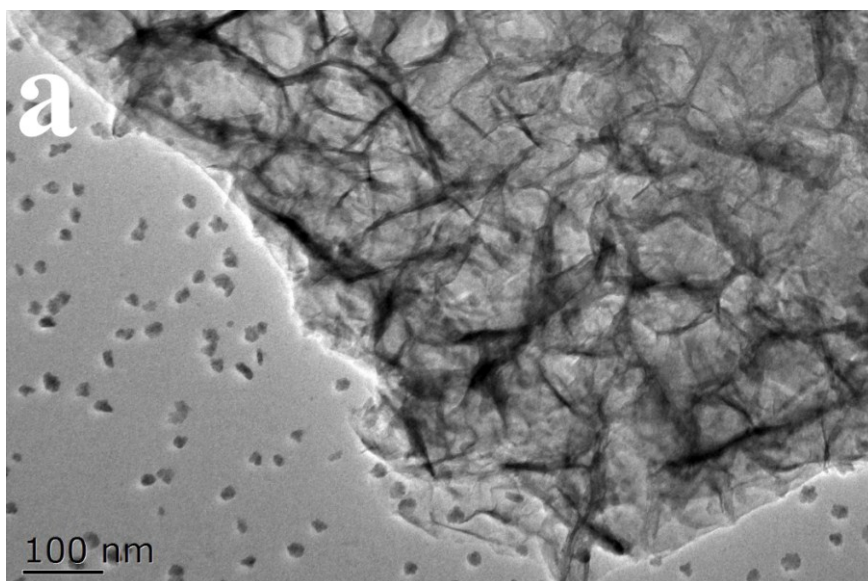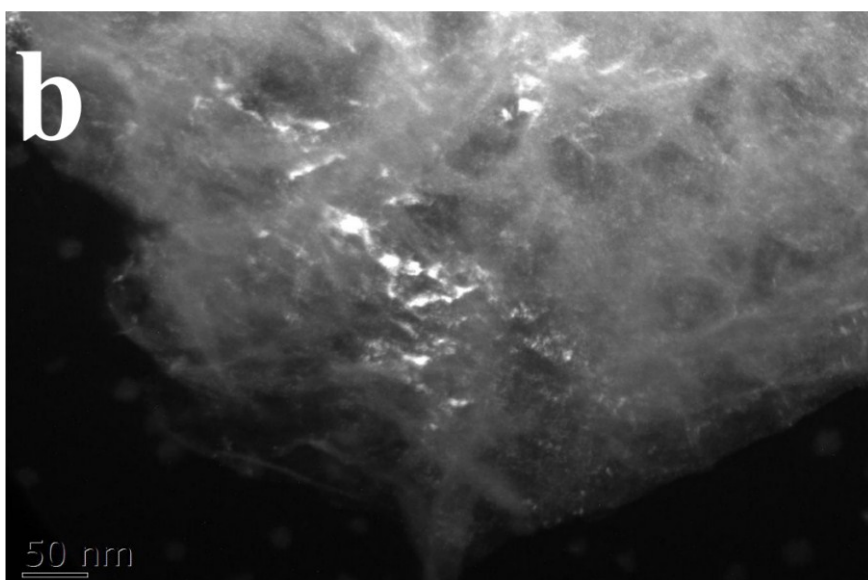

**Fig. S3** (a) TEM and (a) high-angle annular dark field scanning transmission electron microscopy (HAADF-STEM) images of NiFe-LDH.

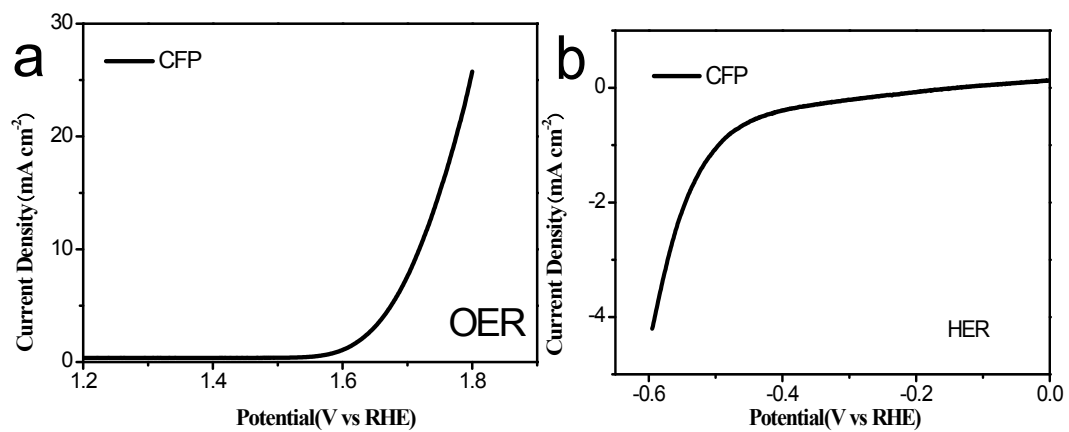

**Fig. S4** LSV curves of bare CFP in 1 M KOH to show the background activity for catalyzing OER and HER.

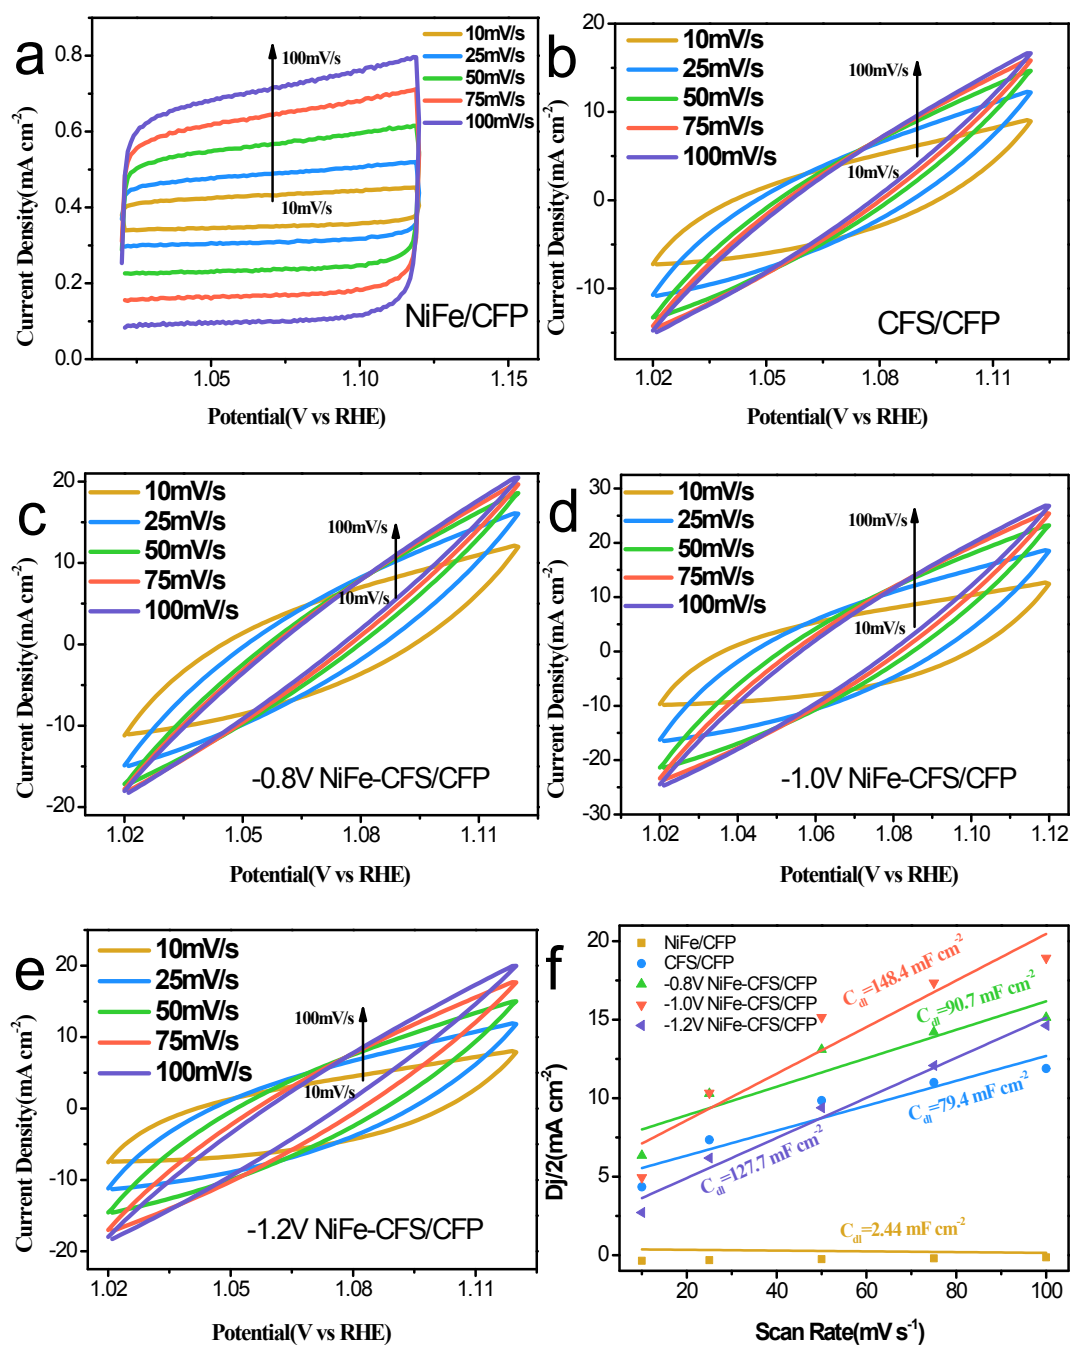

**Fig. S5** Cyclic voltammograms of (a) NiFe/CFP, (b) CFS/CFP, (c) -0.8V NiFe-CFS/CFP, (d) -1.0V NiFe-CFS/CFP, and (e) -1.2V NiFe-CFS/CFP composite electrodes between the potential regions of 0.02 and 0.12 V (vs Ag/AgCl) with scan rates of 10, 25, 50, 75, and 100 mV/s toward OER 1 M KOH solution. (f) Current density differences plotted against scan rates under a non-Faradaic range.

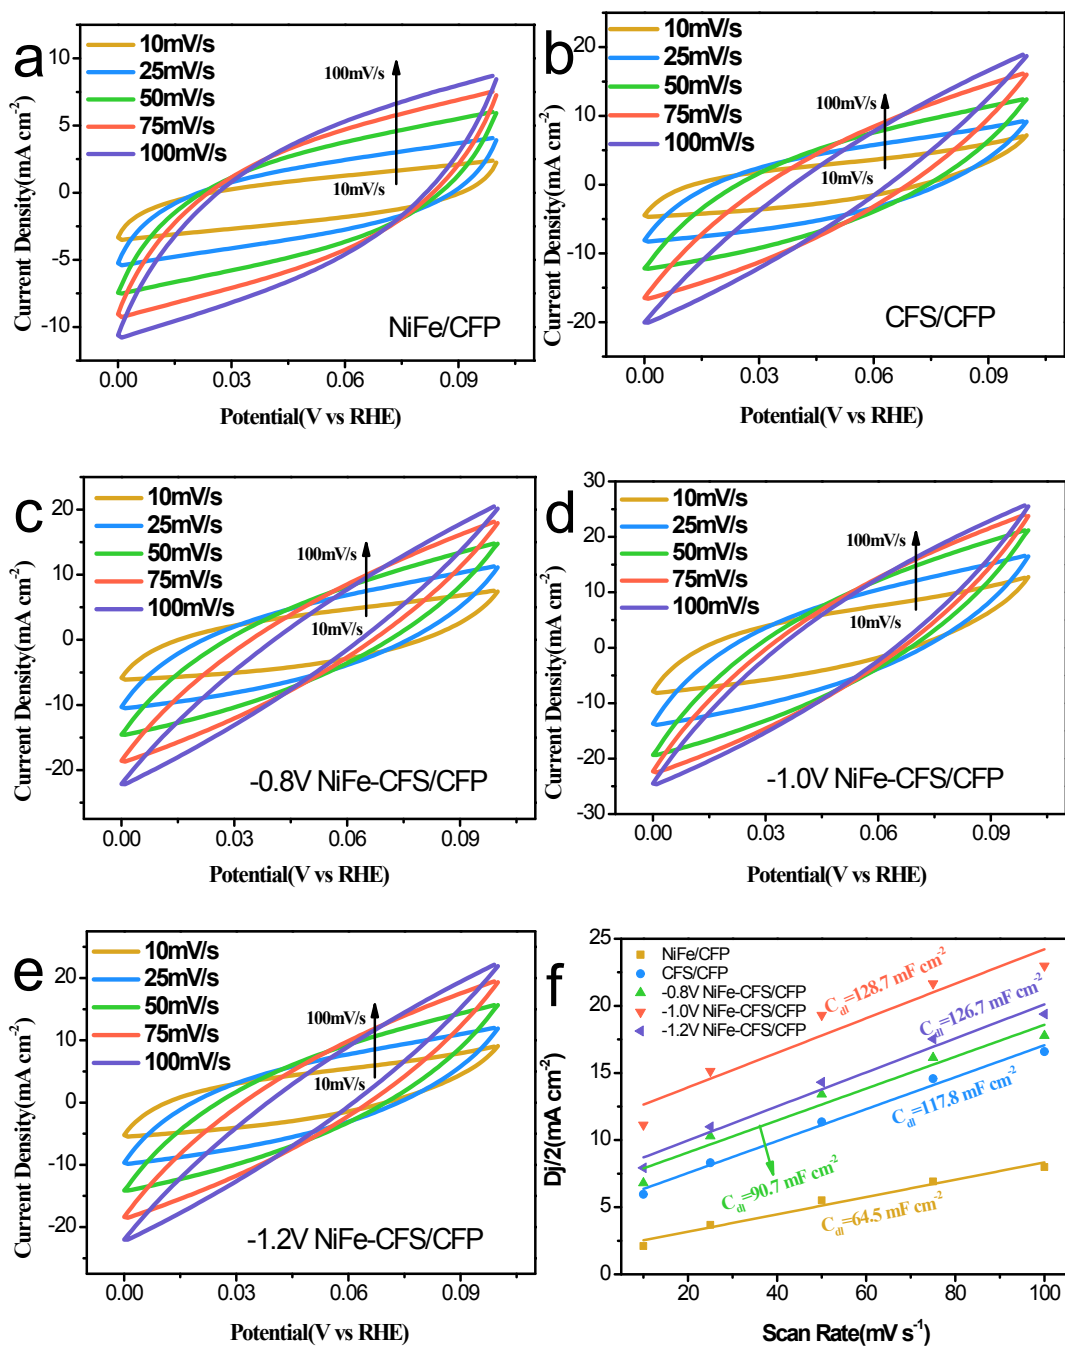

**Fig. S6** Cyclic voltammograms of (a) NiFe/CFP, (b) CFS/CFP, (c) -0.8V NiFe-CFS/CFP, (d) -1.0V NiFe-CFS/CFP, and (e) -1.2V NiFe-CFS/CFP composite electrodes between the potential regions of 0 and 0.1 V (vs Ag/AgCl) with scan rates of 10, 25, 50, 75, and 100 mV/s toward HER 1 M KOH solution. (f) Current density differences plotted against scan rates under a non-Faradaic range.

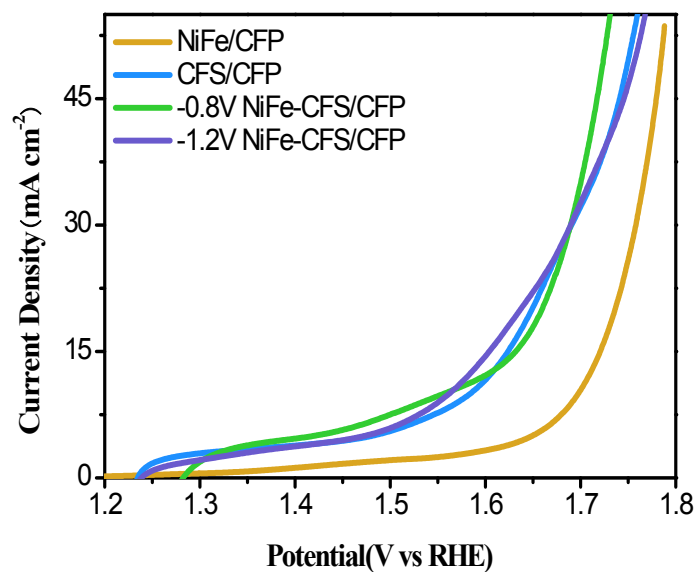

**Fig. S7** (a) The polarization curves of NiFe/CFP, CFS/CFP, -0.8V NiFe-CFS/CFP, and -1.2V NiFe-CFS/CFP catalysts in a two-electrode configuration.

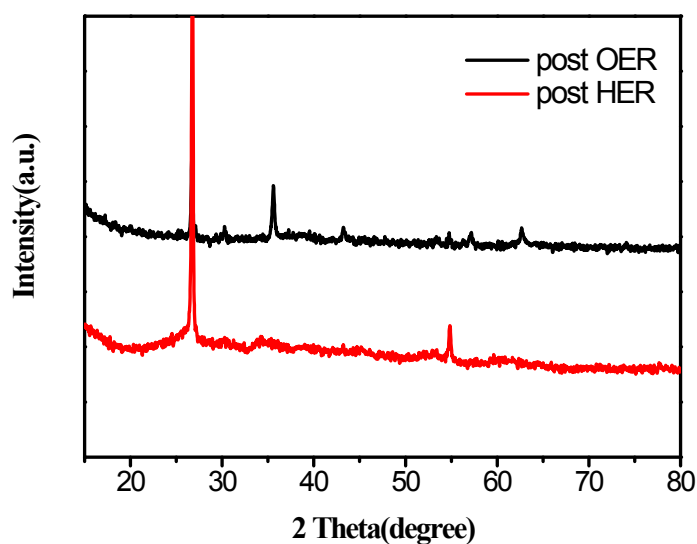

**Fig. S8** XRD patterns of post-OER and post-HER of -1.0V NiFe-CFS/CFP electrocatalysts.

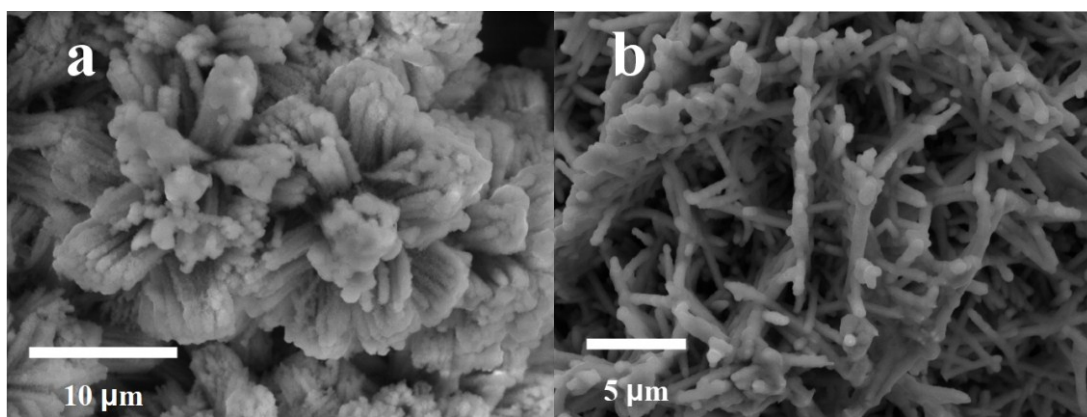

**Fig. S9** Low magnification SEM images of -1.0V NiFe-CFS/CFP after long-term (a) OER and (b) HER electrolysis.



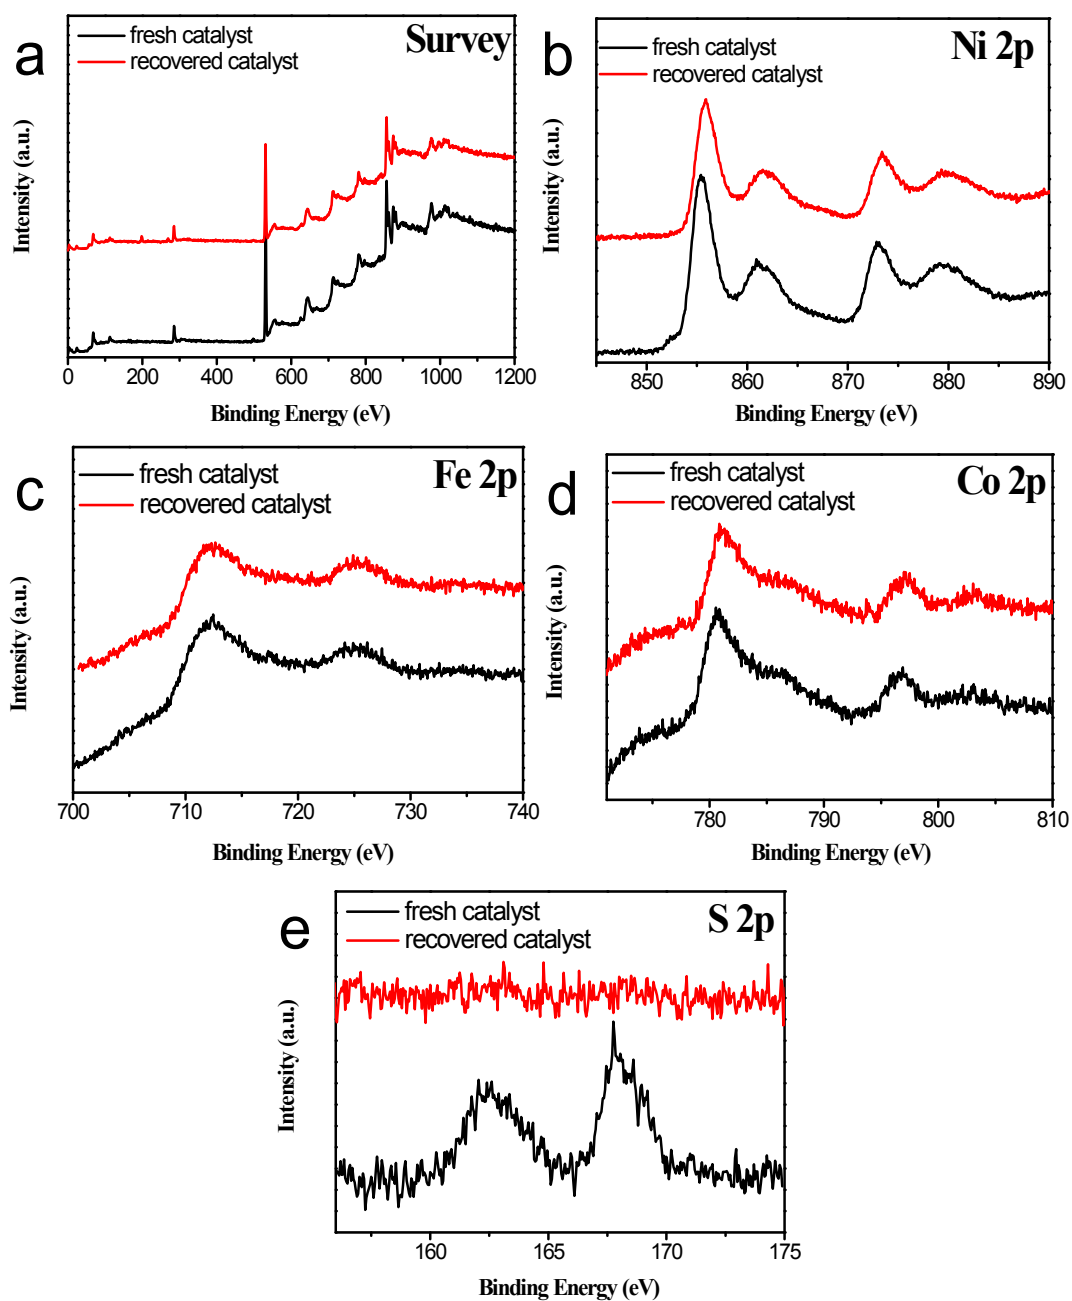

**Fig. S10** XPS high-resolution spectra of (a) survey (b) Ni 2p (c) Fe 2p (d) Co 2p and (e) S 2p of fresh and recovered -1.0V NiFe-CoFe<sub>2</sub>O<sub>4</sub>@Co<sub>3</sub>S<sub>4</sub>/CFP electrocatalysts.

**Table S1** Comparison of OER properties for electrocatalysts of catalytic materials

| Electrode                                     | Electrolyte | $\eta$ (mV)                     | Reference                                              |
|-----------------------------------------------|-------------|---------------------------------|--------------------------------------------------------|
| -1.0V NiFe-CFS/CFP                            | 1 M KOH     | 233.3 mV@ 50 mAcm <sup>-2</sup> | This work                                              |
| NiFe/CFP                                      | 1 M KOH     | 292.9 mV@ 50 mAcm <sup>-2</sup> | This work                                              |
| CFS/CFP                                       | 1 M KOH     | 285.2 mV@ 50 mAcm <sup>-2</sup> | This work                                              |
| Ru <sub>2</sub> O/CFP                         | 1 M KOH     | 304.8 mV@ 50 mAcm <sup>-2</sup> | This work                                              |
| Ir <sub>2</sub> O/CFP                         | 1 M KOH     | 445.3 mV@50 mA cm <sup>-2</sup> | This work                                              |
| 3D porous CoFe <sub>2</sub> O <sub>4</sub> /C | 1 M KOH     | 240 mV@10 mA cm <sup>-2</sup>   | <i>Adv. Mater.</i> <b>2017</b> , 29, 1604437.          |
| Co <sub>1</sub> Mn <sub>1</sub> CH*           | 1 M KOH     | 322 mV@50 mA cm <sup>-2</sup>   | <i>J. Am. Chem. Soc.</i> <b>2017</b> , 139, 8320-8328. |
| CoFeO <sub>x</sub> /NF                        | 1 M KOH     | 270 mV@10 mA cm <sup>-2</sup>   | <i>J. Am. Chem. Soc.</i> <b>2016</b> , 138, 8946-8957. |
| NiFe/NiCo <sub>2</sub> O <sub>4</sub> /NF     | 1 M KOH     | 320 mV@600 mA cm <sup>-2</sup>  | <i>Adv. Funct. Mater.</i> <b>2016</b> , 26, 3515-3523. |
| Ni <sub>3</sub> Fe(OH) <sub>9</sub> /NF       | 1 M KOH     | 370 mV@100 mA cm <sup>-2</sup>  | <i>Nat. Commun.</i> <b>2015</b> , 6, 6616.             |
| Carbon-Confined<br>NiCo@NiCoO <sub>2</sub>    | 1 M KOH     | 330 mV@ 10 mAcm <sup>-2</sup>   | <i>Adv. Mater.</i> <b>2018</b> , 1705442               |
| NiFe/Cu <sub>2</sub> O NWs/CF                 | 1 M KOH     | 215 mV@ 10 mAcm <sup>-2</sup>   | <i>ChemSusChem</i> <b>2017</b> , 10, 1475-1481.        |
| Ni <sub>0.6</sub> Co <sub>1.4</sub> P         | 1 M KOH     | 300 mV@ 10 mAcm <sup>-2</sup>   | <i>Adv. Funct. Mater.</i> <b>2018</b> , 28, 1706008    |
| Co-NC@Mo <sub>2</sub> C                       | 1 M KOH     | 347 mV@ 10 mAcm <sup>-2</sup>   | <i>Nano Energy</i> <b>2019</b> , 57, 746               |
| NiCo <sub>2</sub> O <sub>4</sub> /NF*         | 1 M KOH     | 420 mV@ 50 mAcm <sup>-2</sup>   | <i>Adv. Funct. Mater.</i> <b>2016</b> , 26, 4661.      |
| NiFe-LDH/CNT                                  | 1 M KOH     | 247 mV@ 10 mAcm <sup>-2</sup>   | <i>J Am Chem Soc.</i> <b>2013</b> , 135, 8452-8455.    |

**Table S2** Comparison of HER properties for electrocatalysts of catalytic materials

| Electrode                                                       | Electrolyte | $\eta$ (mV)                    | Reference                                                       |
|-----------------------------------------------------------------|-------------|--------------------------------|-----------------------------------------------------------------|
| -1.0V NiFe-CFS/CFP                                              | 1 M KOH     | 98 mV@ 10 mAcm <sup>-2</sup>   | This work                                                       |
| Pt-C/CFP                                                        | 1 M KOH     | 35.8 mV@ 10 mAcm <sup>-2</sup> | This work                                                       |
| Ni <sub>0.75</sub> Fe <sub>0.125</sub> V <sub>0.125</sub> -LDHs | 1 M KOH     | 125 mV@ 10 mAcm <sup>-2</sup>  | <i>Small</i> , <b>2018</b> , 14, 1703257.                       |
| Ni <sub>5</sub> P <sub>4</sub> /NiP <sub>2</sub> /NiFe LDH      | 1 M KOH     | 124 mV@ 10 mAcm <sup>-2</sup>  | <i>J. Mater. Chem. A</i> , <b>2018</b> , 6, 13619-13623.        |
| Co <sub>3</sub> O <sub>4</sub> @MoS <sub>2</sub>                | 1 M KOH     | 90 mV@ 10 mAcm <sup>-2</sup>   | <i>J. Mater. Chem. A</i> <b>2017</b> , 28, 2067-2072.           |
| MoS <sub>2</sub> nanowall                                       | 1 M NaOH    | 150 mV@ 10 mAcm <sup>-2</sup>  | <i>Nano Res.</i> <b>2017</b> , 10, 1178-1188.                   |
| MoS <sub>2</sub> /Ni <sub>3</sub> S <sub>2</sub> /NF            | 1 M KOH     | 110 mV@ 10 mAcm <sup>-2</sup>  | <i>Angew. Chem.</i> <b>2016</b> , 55, 6702-6707                 |
| NCNT/Ni-NiFe <sub>2</sub> O <sub>4</sub> /Ni foam               | 1 M KOH     | 140 mV@ 10 mAcm <sup>-2</sup>  | <i>Catal. Sci. Technol.</i> <b>2019</b> , 9, 1595-1601          |
| NiCo <sub>2</sub> O <sub>4</sub> /NiFe LDH                      | 1 M KOH     | 192 mV@ 10 mAcm <sup>-2</sup>  | <i>ACS Appl. Mater. Interfaces</i> <b>2017</b> , 9, 1488.       |
| Cu@NC NT/CF                                                     | 1 M KOH     | 123 mV@ 10 mAcm <sup>-2</sup>  | <i>ACS Appl. Mater. Interfaces</i> <b>2017</b> , 9, 36857-36864 |
| NiMoN                                                           | 1 M KOH     | 109 mV@ 10 mAcm <sup>-2</sup>  | <i>Adv. Energy Mater.</i> <b>2016</b> , 6, 1600221-1600227.     |
| Fe <sub>3</sub> C embedded Fe/N doped Carbon fiber              | 1 M KOH     | 86 mV@ 10 mAcm <sup>-2</sup>   | <i>J. Mater. Chem. A</i> <b>2017</b> , 5, 7507-7515.            |
| Co <sub>1</sub> Mn <sub>1</sub> CH/NF                           | 1 M KOH     | 180 mV@ 10 mAcm <sup>-2</sup>  | <i>J. Am. Chem. Soc.</i> <b>2017</b> , 139, 8320-8328.          |

**Table S3** Comparison of overall water splitting performance for the recently reported catalysts and ours.

| Electrode                                        | Electrolyte | $\eta$ (mV)                   | Reference                                                        |
|--------------------------------------------------|-------------|-------------------------------|------------------------------------------------------------------|
| -1.0V NiFe-FCS/CFP                               | 1 M KOH     | 1.53 V@ 10 mAcm <sup>-2</sup> | This work                                                        |
| NF@Ni/NiP                                        | 1 M KOH     | 1.61V@ 10 mAcm <sup>-2</sup>  | <i>Adv. Funct. Mater.</i> <b>2016</b> , 26, 3314-3323            |
| Cu@NiFe LDH                                      | 1 M KOH     | 1.54V@ 10 mAcm <sup>-2</sup>  | <i>Energy Environ. Sci.</i> <b>2017</b> , 10, 1820-1827          |
| NC@CuCo <sub>2</sub> N <sub>x</sub> /CF          | 1 M KOH     | 1.62V@ 10 mAcm <sup>-2</sup>  | <i>Adv. Funct. Mater.</i> <b>2017</b> , 27, 1704169.             |
| NiFe LDH/NF                                      | 1 M KOH     | 1.70 V@ 10 mAcm <sup>-2</sup> | <i>Science</i> , <b>2014</b> , 345, 1593-1596.                   |
| Ni <sub>0.69</sub> Co <sub>0.31</sub> P          | 1 M KOH     | 1.59V@ 10 mAcm <sup>-2</sup>  | <i>Nanoscale</i> <b>2016</b> , 8, 19129.                         |
| Co <sub>1</sub> Mn <sub>1</sub> CH               | 1 M KOH     | 1.68 V@ 10 mAcm <sup>-2</sup> | <i>J. Am. Chem. Soc.</i> <b>2017</b> 139, 8320-8328.             |
| NiS/Ni <sub>2</sub> P/CC                         | 1 M KOH     | 1.62 V@ 10 mAcm <sup>-2</sup> | <i>J. Mater. Chem. A</i> <b>2018</b> , 6, 8233.                  |
| Co <sub>3</sub> S <sub>4</sub> @MoS <sub>2</sub> | 1 M KOH     | 1.58 V@ 10 mAcm <sup>-2</sup> | <i>Nano Energy</i> <b>2018</b> , 47, 494.                        |
| Ni-Co-P hollow nanobricks                        | 1 M KOH     | 1.62 V@ 10 mAcm <sup>-2</sup> | <i>Energy &amp; Environmental Science</i> <b>2018</b> , 11, 872. |
| NiCo <sub>2</sub> S <sub>4</sub> @NiFe LDH       | 1 M KOH     | 1.60 V@ 10 mAcm <sup>-2</sup> | <i>ACS Appl. Mater. Interfaces</i> <b>2017</b> , 9, 15364-15372. |
